# Supplementary material
Source: PubMed Central journal article supplement (PMC5741078)
Supplement: NIHMS927062-supplement-Supplemental_Information.pdf [file NIHMS927062-supplement-Supplemental_Information.pdf]

## SUPPLEMENTARY FIGURES

### Heterologous expression and characterization of plant Taxadiene-5 $\alpha$ -Hydroxylase (CYP725A4) in *Escherichia coli*

*John Edward Rouck*<sup>1</sup>, *Bradley Walters Biggs*,<sup>2,3</sup> *Amogh Kambalyal*<sup>1</sup>, *William Arnold*<sup>1</sup>, *Marjan De Mey*<sup>4</sup>, *\*Parayil Kumaran Ajikumar*<sup>2</sup> and *\*Aditi Das*<sup>1</sup>

<sup>1</sup>Department of Comparative Biosciences, Department of Biochemistry, Department of Bioengineering, Division of Nutritional Science, Center for Biophysics and Quantitative Biology, Beckman Institute for Advanced Science and Technology, University of Illinois Urbana-Champaign, Urbana, Illinois 61801

<sup>2</sup>Manus Biosynthesis, 1030 Massachusetts Avenue, Suite 300, Cambridge, MA 02138

<sup>3</sup>Department of Chemical and Biological Engineering (Masters in Biotechnology Program), Northwestern University, Evanston, IL 60208

<sup>4</sup>Centre for Industrial Biotechnology and Biocatalysis, Ghent University, Coupure Links 653, B-9000, Belgium

## SUPPLEMENTAL TABLE OF CONTENTS

|                                                                     |              |
|---------------------------------------------------------------------|--------------|
| Purification Schematic                                              | S-1          |
| Hydrophobicity Plot of Wild Type CYP725A4                           | S-2          |
| Construct Definition Table                                          | S-3          |
| Construct Sequences                                                 | S-4 to S-9   |
| Native- and SDS-PAGE of CYP725A4 17 $\alpha$ -L-CPR                 | S-10         |
| GC-MS for Kinetics                                                  | S-11 to S-17 |
| MOE Rendering of Active Site and Output of Residues Used in Docking | S-18         |

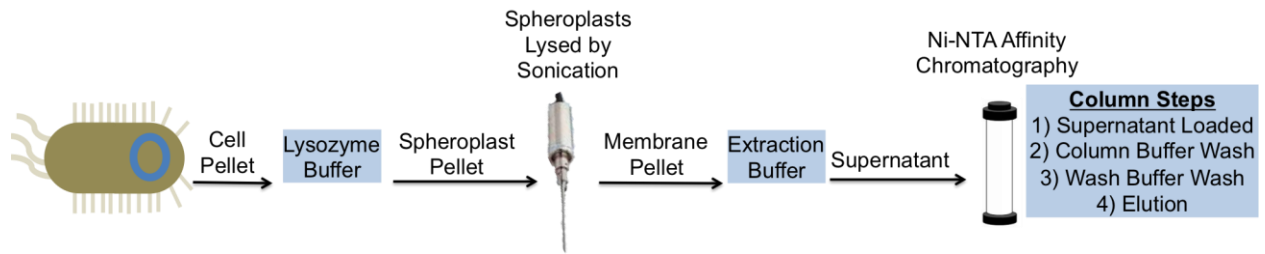

**Figure S-1:** Schematic of the purification of His-tagged CYP725A4-CPR chimeras. The cell pellet is dissolved in lysozyme buffer followed by centrifuging to isolate the spheroplasts. The spheroplasts are further sonicated to obtain the membrane pellet from which the proteins are extracted and applied to the Ni-NTA affinity column (Black arrows represent centrifugation steps).

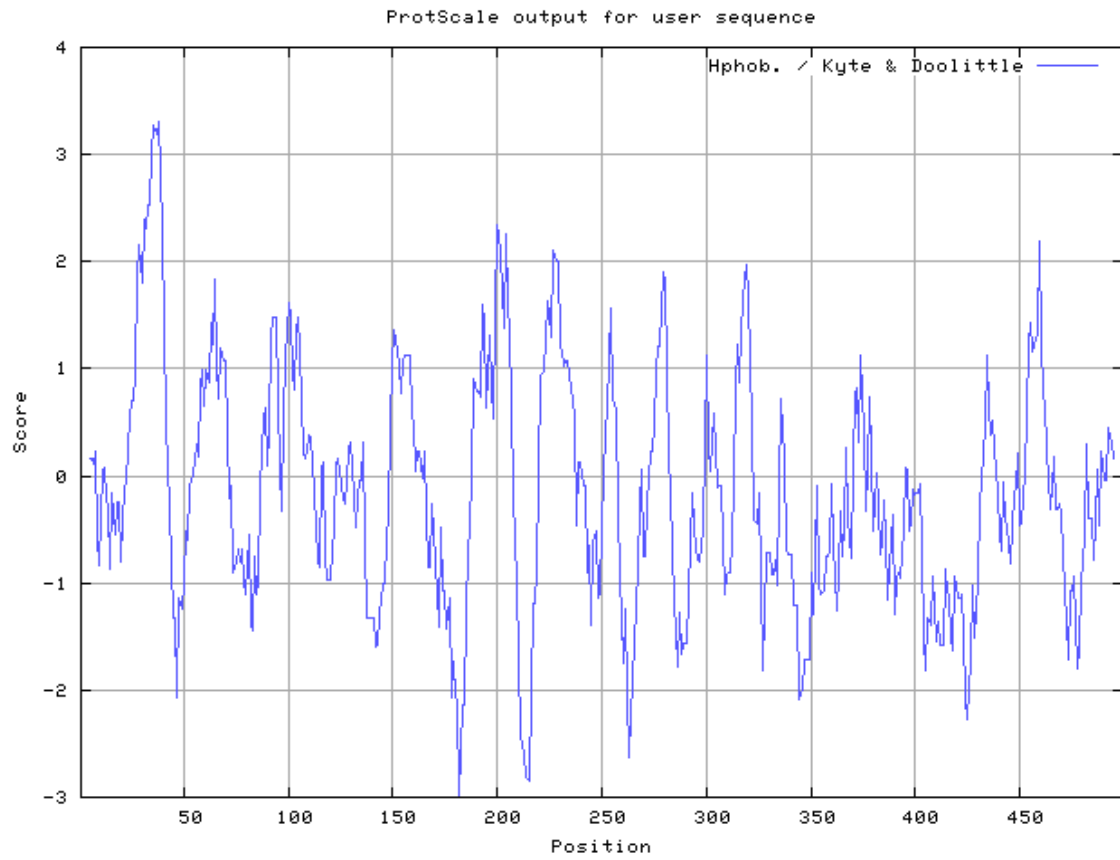

**Figure S2.** *Hydrophobicity Plot of Wild Type Taxus cuspidata CYP725A4.*  
Hydrophobicity plot of wild-type *Taxus cuspidata* CYP725A4.

**Figure S-3.** Construct Definition Table

| <b>Construct Abbreviation</b> | <b>Construct Definition</b>                                                                                             | <b>Figure Containing Sequence</b> |
|-------------------------------|-------------------------------------------------------------------------------------------------------------------------|-----------------------------------|
| CYP725A4-17 $\alpha$          | CYP725A4 with 17 $\alpha$ N-terminal modification                                                                       | S-4                               |
| CYP725A4-MA                   | CYP725A4 with MA N-terminal modification                                                                                | S-5                               |
| CYP725A4-2b1                  | CYP725A4 with 17 $\alpha$ N-terminal modification                                                                       | S-6                               |
| CYP725A4-17 $\alpha$ -L-CPR   | CYP725A4 with 17 $\alpha$ N-terminal modification fused to Taxus Cuspidata CPR with a similar 17 $\alpha$ modification. | S-7                               |
| CYP725A4-MA-L-CPR             | CYP725A4 with 17 $\alpha$ N-terminal modification fused to Taxus Cuspidata CPR with a similar 17 $\alpha$ modification. | S-8                               |
| CYP725A4-2b1-L-CPR            | CYP725A4 with 17 $\alpha$ N-terminal modification fused to Taxus Cuspidata CPR with a similar 17 $\alpha$ modification. | S-9                               |

MALLLAVFFSIALSAIAGILLLLLLFRSKRHSSLKLPPGKLGIPFIGESFIFLRA  
LRSNSLEQFFDERVKKFGLVFKTSLIGHPTVVLCGPAGNRLILSNEEKLVQ  
MSWPAQFMKLMGENSVATRRGEDHIVMRSALAGFFGPGALQSYIGKMNT  
EIQSHINEKWKGKDEVNVLPLVRELVFNISAILFFNIYDKQEQRDLHKLLET  
ILVGSFALPIDLPGFGFHRALQGRAKLNKIMLSLIKRRKEDLQSGSATATQD  
LLSVLLTFRDDKGTPLTNDEILDNFSSLLHASDYDTTSPMALIFKLLSSNPEC  
YQKVVQEQLLEILSNKEEGEEITWKDLKAMKYTWQVAQETLRMFPPVFGTF  
RKAITDIQYDGYTIPKGWKLWTTYSTHPKDLYFNEPEKFMPSRFDQEGK  
HVAPYTFLPFGGGQRSCVGVWEFSKMEILLFVHHFVKTFSYTPVDPDEKIS  
GDPLPPLPSKGFSLKLFPRP

**Figure S-4.** *CYP725A4-17 $\alpha$  Sequence.* CYP725A4 17  $\alpha$  Construct Sequence: The yellow highlighted region is the 17  $\alpha$  modification to CYP725A4. The region that is not highlighted is unmodified *Taxus cuspidata* CYP725A4. A 6-residue histidine tag is added to the C-Terminus.

MAPFIGESFIFLRALRSNSLEQFFDERVKKFGLVFKTSLIGHPTVVLCGPAG  
NRLILSNEEKL VQMSWPAQFMKLMGENSVATRRGEDHIVMRSALAGFFGP  
GALQSYIGKMNTEIQSHINEKWKKGDEVNVLPLVRELVFNISAILFFNIYDK  
QEQDRLHKLLETILVGSFALPIDLPGFGFHRALQGRAKLNKIMLSLIKRRKE  
DLQSGSATATQDLLSVLLTFRDDKGTPLTNDEILDNFSSLLHAS YDTTSP  
MALIFKLLSSNPECYQKV VQEQL EILSNKEEGEEITWKDLKAMKYTWQVA  
QETLRMFPPVFGTFRKAITDIQYDGYTIPKGWKLWTTYSTHPKDLYFNEP  
EKFMPSRFDQEGKHVAPYTFLPFGGGQRSCVGVWEFSKMEILLFVHHFVKT  
FSSYTPVDPDEKISGDPLPPLPSKGFSIKLFRP

**Figure S-5:** *CYP725A4-MA Sequence*. CYP725A4 MA  $\alpha$  Construct Sequence: The yellow highlighted region is the MA modification to CYP725A4. The region that is not highlighted is unmodified *Taxus cuspidata* CYP725A4. A 6-residue histidine tag is added to the C-Terminus.

MAKKTSSKGKLPGPS PFIGESFIFLRALRSNSLEQFFDERVKKFGLVFKTSL  
IGHPTVVLCGPAGNRLILSNEEKL VQMSWPAQFMKLMGENSVATRAGED  
HIVMRSALAGFFGPGALQSYIGKMNTEIQSHINEKWKGKDEVNVLPLVRE  
LVFNISAILFFNIYDKQEQRDLHKLLETILVGSFALPIDLPGFGFHRALQGRA  
KLNKIMLSLIKRRKEDLQSGSATATQDLLSVLLTFRDDKGTPLTNDEILDNF  
SSLLHASYDTTSPMALIFKLLSSNPECYQKVVQEQLLEILSNKEEGEEITWK  
DLKAMKYTWQVAQETLRMFPPVFGTFRKAITDIQYDGYTIPKGWKLWT  
TYSTHPKDL YFNEPEKFMPSRFDQEGKHVAPYTFLPFGGGQRSCVGVWEFS  
KMEILLFVHHFVKTFSSYTPVDPDEKISGDPLPPLPSKGFSIKLFPRP

**Figure S-6.** *CYP25A4-2b1* Sequence. CYP725A4 2b1 Construct Sequence: The yellow highlighted region is the 2b1 modification to CYP725A4. The region that is not highlighted is unmodified *Taxus cuspidata* CYP725A4. A 6-residue histidine tag is added to the C-Terminus.



MALLLAVFFSIALSAIAGILLLLLLFRSKRHSSLKLPPGKLGIPFIGESFIFLRA  
LRSNSLEQFFDERVKKFGLVFKTSLIGHPTVVLCGPAGNRLILSNEEKLVQ  
MSWPAQFMKLMGENSVATRRGEDHIVMRSALAGFFGPGALQSYIGKMNT  
EIQSHINEKWKGKDEVNVLPLVRELVFNISAILFFNIYDKQEQRDLHKLLET  
ILVGSFALPIDLPGFGFHRALQGRAKLNKIMLSLIKRRKEDLQSGSATATQD  
LLSVLLTFRDDKGTPLTNDEILDNFSSLLHASDYDTTSPMALIFKLLSSNPEC  
YQKVVEQLEILSNKEEGEEITWKDLKAMKYTWQVAQETLRMFPPVFGTF  
RKAITDIQYDGYTIPKGWKLWTTYSTHPKDLYFNEPEKFMPSRFDQEGK  
HVAPYTFLPFGGGQRSCVGVWFSKMEILLFVHHFVKTFSSTPVPDPDEKIS  
GDPLPPLPSKGFSIKLFPRPGSTGSMALLLAVFRRGGSDTQKPAVRPTPLVK  
EEDEEEEDDSAKKKVTIFFGTQTGTAEGFAKALAEAKARYEKA VFKVVD  
LDNYAADDEQYEEKLKKKELAFFMLATYGDGEPTDNAARFYKWFLEGKE  
REPWLSDLTYGVFGLGNRQYEHFNKVAKAVDEVLIEQGAKRLVPVGLGD  
DDQCIEDDFTA WREQVWPELDQLLRDEDEDEPTSATPYTAAIPEYRVEIYDS  
VVSVEETHALKQNGQAVYDIHHPCRSNVA VRRELHTPLSDRSCIHLEFDI  
SDTGLIYETGDHVG VHTENSIETVEEAAKLLGYQLDTIFS VHGDKEDGTPL  
GGSSLPFPFGPCTLR TALAR YADLLNPPRKA AFLALAAHASDPAEAERLK  
FLSSPAGKDEYSQWVTASQRSLEIMAEFPSAKPPLGVFFAAIAPRLQPRYY  
SISSPRFAPSRIHVTCALVYGPSPTGRIHKGVC SNWMKNSLPSEETHDCSW  
APVFVRQSNFKLPADSTTPIVMVGP GTGFAPFRGFLQERAKLQEAGEKLG  
AVLFFGCRNRQMDYIYEDELKGYVEKGILTNLIVAFSREGATKEYVQHKM  
LEKASDTWSLIAQGGYLYVCGDAKGMARDVHRTLHTIVQE QESVDSSKA  
EFLVKKLQMDGRYLRDIW

**Figure S-7.** *CYP725A4-17- $\alpha$ -L-CPR Sequence.* The yellow highlighted region is the 17  $\alpha$  modification to CYP725A4. The region that is not highlighted is unmodified *Taxus Cuspidata* CYP725A4. The pink highlighted region is the linker portion of the chimera peptide. The cyan highlighted region is the 17  $\alpha$  modification to the *Taxus Cuspidata* CPR. The green highlighted region is unmodified *Taxus Cuspidata* CPR. A 6-residue histidine tag is added to the C-Terminus.

MAPFIGESFIFLRALRSNSLEQFFDERVKKFGLVFKTSLIGHPTVVLCGPAG  
NRLILSNEEKLVQMSWPAQFMKLMGENSVATRAGEDHIVMRSALAGFFGP  
GALQSYIGKMNTEIQSHINEKWKGKDEVNVLPLVRELVFNISAILFFNIYDK  
QEQDRLHKLLETILVGSFALPIDLPGFGFHRALQGRAKLNKIMLSLIKRRKE  
DLQSGSATATQDLLSVLLTFRDDKGTPLTNDEILDNFSSLLHASYDTTSP  
MALIFKLLSSNPECYQKVVEQLEILSNKEEGEITWKDLKAMKYTWQVA  
QETLRMFPPVFGTFRKAITDIQYDGYTIPKGWKLWTTYSTHPKDLYFNEP  
EKFMPSRFDQEGKHVAPYTFLPFGGGQRSCVGVWEFSKMEILLFVHHFVKT  
FSSYTPVDPDEKISGDPLPPLPSKGFSLKLFPRP GSTGSMARRGGS DTQKPAV  
RPTPLVKEEDEEEEDDSA KKKVTIFFGTQTGTAE GFAKALAEAKARYEK  
AVFKVVDLDNYAADDEQYEEKLKKEKLAF FMLATYGDGEPTDNAARFY  
KWFLE GKEREPWLS DLT YGVFGLGNRQYEHFNKVA KAVDEV LIEQGA KR  
LVPVGLGDDDQCIEDDFTAWREQVWPELDQLLRDEDEPT SATPYTAAIP  
EYRVEIYDSVVSVEETHALKQNGQAVYDIHHP CRSNVAVRRELHTPLSD  
RSCIHLEFDISDTGLIYETGDHVG VHTENS IETVEEAAKLLGYQLDTIFS VH  
GDKEDGTPLGGSSLPPFP GPCTLR TALAR YADLLNPPRKA AFLALAAHAS  
DPAEAERL KFLSSPAGKDEYSQWVTASQRS LLEIMAEFPSAKPPLGVFFAAI  
APRLQPRYYSISSPRFAPSRIHVTCALVYGPSPTGRIHKGVCSNWMKNSLP  
SEETHDCSWAPVFVRQSNFKLPADSTTPIVMVGP GTGFAPFRGFLQERAKL  
QEAGEKLGPAVLFFGCRNRQMDYIYEDELKGYVEKGILTNLIVAFSREGAT  
KEYVQHKMLEKASDTWSLIAQGGYLYVCGDAKGMARDVHRTLHTIVQE  
QESVDSSKA EFLVKKLQMDGRYLRDIW

**Figure S-8.** *CYP725A4-MA-L-CPR*. The yellow highlighted region is the MA modification to *CYP725A4*. The region that is not highlighted is unmodified *Taxus Cuspidata* *CYP725A4*. The pink highlighted region is the linker portion of the chimera peptide. The cyan highlighted region is the MA modification to the *Taxus cuspidata* CPR. The green highlighted region is unmodified *Taxus Cuspidata* CPR. A 6-residue histidine tag is added to the C-Terminus.

MAKKTSSKGKLPGPS PFIGESFIFLRALRSNSLEQFFDERVKKFGLVFKTSL  
 IGHPTVVLCPAGNRLILSNEEKL VQMSWPAQFMKLMGENSVATRRGED  
 HIVMRSALAGFFGPGALQSYIGKMNTEIQSHINEKWKGKDEVNVLPLVRE  
 LVFNISAILFFNIYDKQEQRDLHKLLETILVGSFALPIDLPGFGFHRALQGRA  
 KLNKIMLSLIKRRKEDLQSGSATATQDLLSVLLTFRDDKGTPLTNDEILDNF  
 SLLHASDYDTTSPMALIFKLLSSNPECYQKVVQEQLEILSNKEEGEEITWK  
 DLKAMKYTWQVAQETLRMFPPVFGTFRKAITDIQYDGYTIPKGWKLWT  
 TYSTHPKDL YFNEPEKFMPSRFDQEGKHVAPYTFLPFGGGQRSCVGVWEFS  
 KMEILLFVHHFVKTFSSYTPVDPDEKISGDPLPPLPSKGFSIKLFPRP **GSTGS**  
**MAKKTSSKGKLPGPS** PLVKEEDEEEEDDS AKKKVTIFFGTQTGTAEGFAK  
 ALAEEAKARYEKA VFKVVDLDNYAADDEQYEEKLKKKLAFFMLATYG  
 DGEPTDNAARFYKWFLEGKEREPWLSDLTYGVFGLGNRQYEHFNKVAKA  
 VDEVLIEQGAKRLVPVGLGDDDQCIEDDFTA WREQVWPELDQLLRDEDD  
 EPTSATPYTAAIPEYRVEIYDSVVSVEETHALKQNGQAVYDIHHPCRSNV  
 AVRRELHTPLSDRSCIHLEFDISDTGLIYETGDHVGVTENSIVVEAAKL  
 LGYQLDTIFSVHGDKEDGTPLGGSSLPPFPGPCTLR TALARYADLLNPPRK  
 AAFLALAAHASDPAEAERLKFLLSSPAGKDEYSQWVTASQRSLEIMAEFPS  
 AKPPLGVFFAAIAPRLQPRYYSISSSPRFAPSRIHVTCALVYGPSPTGRIHKG  
 VCSNWMKNLSEETHDCSWAPVFVRQSNFKLPADSTTPIVMVGPGTGFA  
 PFRGFLQERAKLQEAGEKLGPAVLFFGCRNRQMDYIYEDELKGYVEKGIL  
 TNLIVAFSREGATKEYVQHMKLEKASDTWSLIAQGGYLYVCGDAKGMAR  
 DVHRTLHTIVQEQESVDSSKAFLVKKLQMDGRYLRDIW

**Figure S-9.** *CYP725A4 2b1 L CPR*. The yellow highlighted region is the 2b1 modification to CYP725A4. The region that is not highlighted is unmodified *Taxus Cuspidata* CYP725A4. The pink highlighted region is the linker portion of the chimera peptide. The cyan highlighted region is the 2b1 modification to the *Taxus cuspidata* CPR. The green highlighted region is unmodified *Taxus Cuspidata* CPR. A 6-residue histidine tag is added to the C-Terminus.

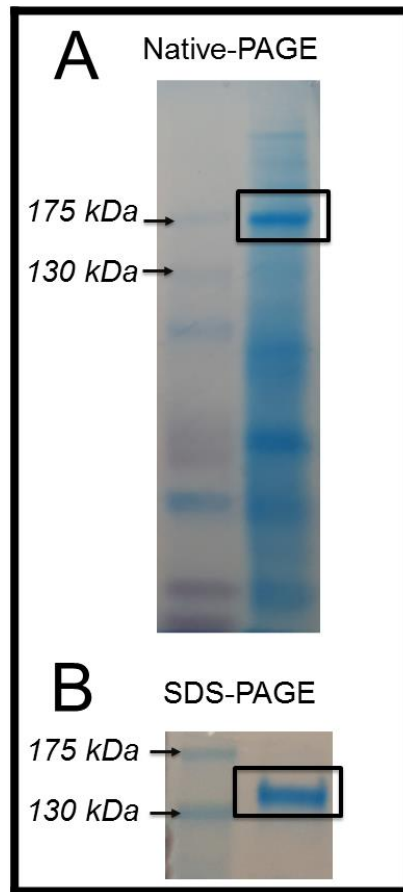

**Figure S-10.** *Native- and SDS-PAGE of CYP725A4-17 $\alpha$ -L-CPR.* Samples were run under (A) native and (B) SDS-denaturing conditions (without boiling) as described in the Materials and Method. Bands corresponding to CYP725A4-17 $\alpha$ -L-CPR are boxed for emphasis. Molecular mass of construct is calculated to be 128 kDa and the molecular mass obtained by the gel is ~104% of this value.

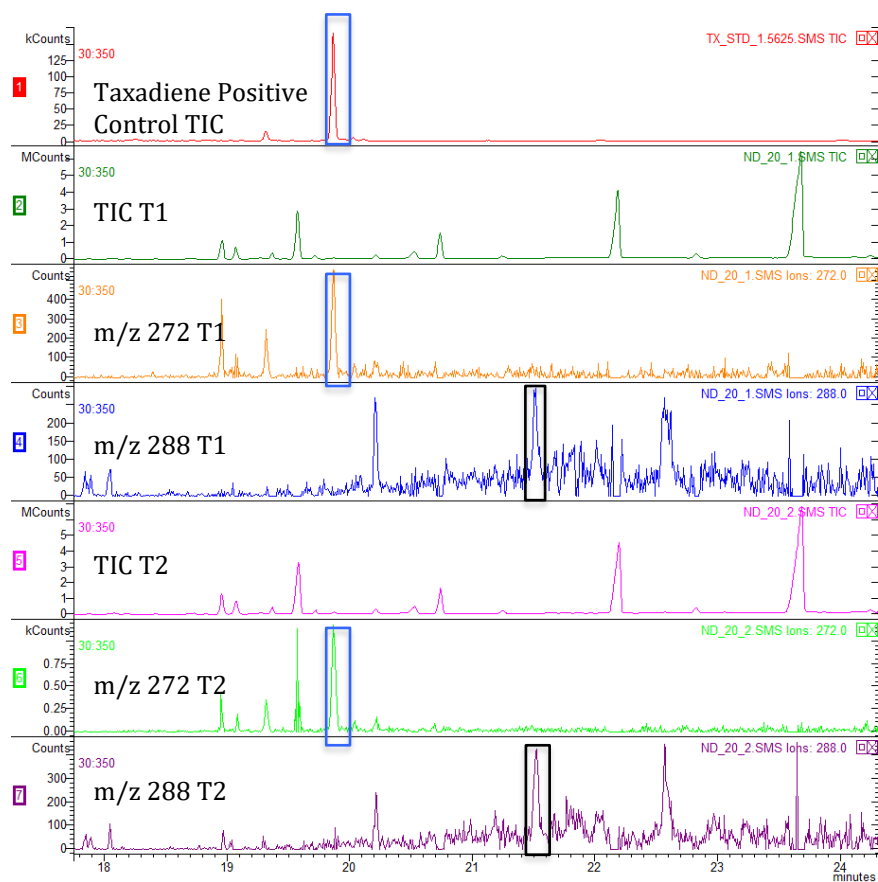

**OCT Values**  
 1 – 620 AU  
 2 – 870 AU

**Figure S-11.** GC of 20  $\mu$ M Taxadiene Incubation for Kinetics Evaluation. The m/z filtering information is found in the left side of each panel. The positive control for Taxadiene (blue box) corresponds to the unreacted taxadiene in each substrate trial (blue boxes in m/z 272). OCT (black box at m/z 288, 21.60 minutes) was identified by matching the retention time of this peak to that our previously identified OCT retention time from our previous work. Peak area was converted to grams by using a taxadiene standard curve.

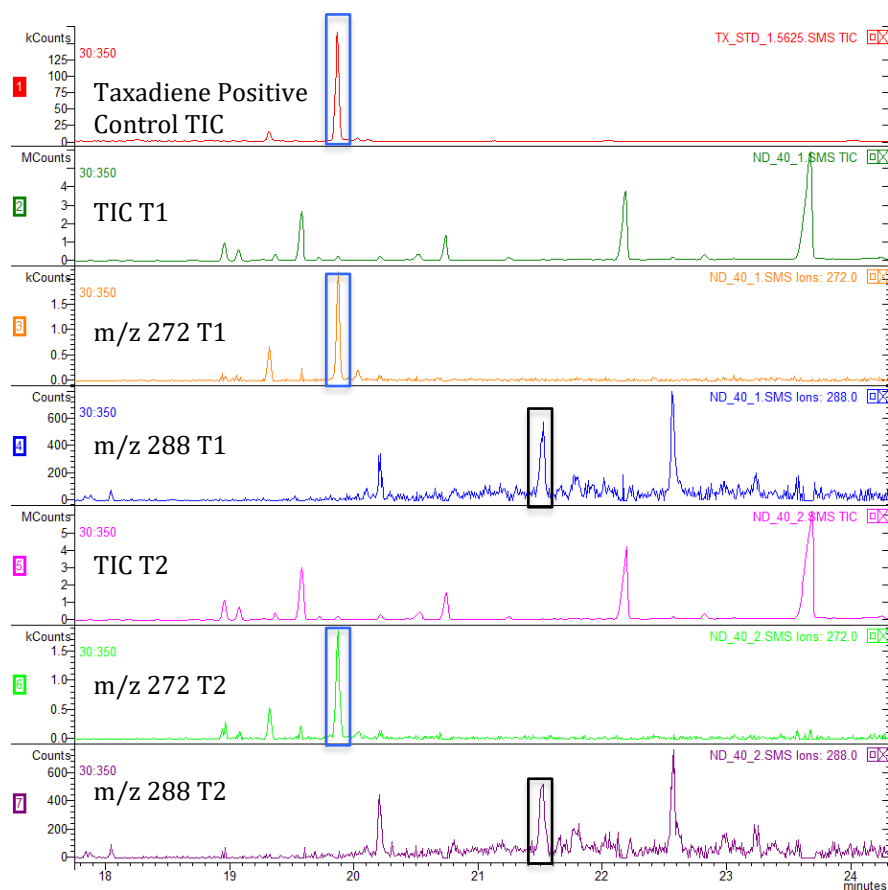

**OCT Values**  
 1 – 1331 AU  
 2 – 1403 AU

**Figure S-12.** GC of 40  $\mu$ M Taxadiene Incubation for Kinetics Evaluation. The m/z filtering information is found in the left side of each panel. The positive control for Taxadiene (blue box) corresponds to the unreacted taxadiene in each substrate trial (blue boxes in m/z 272). OCT (black box at m/z 288, 21.60 minutes) was identified by matching the retention time of this peak to that our previously identified OCT retention time from our previous work. Peak area was converted to grams by using a taxadiene standard curve.

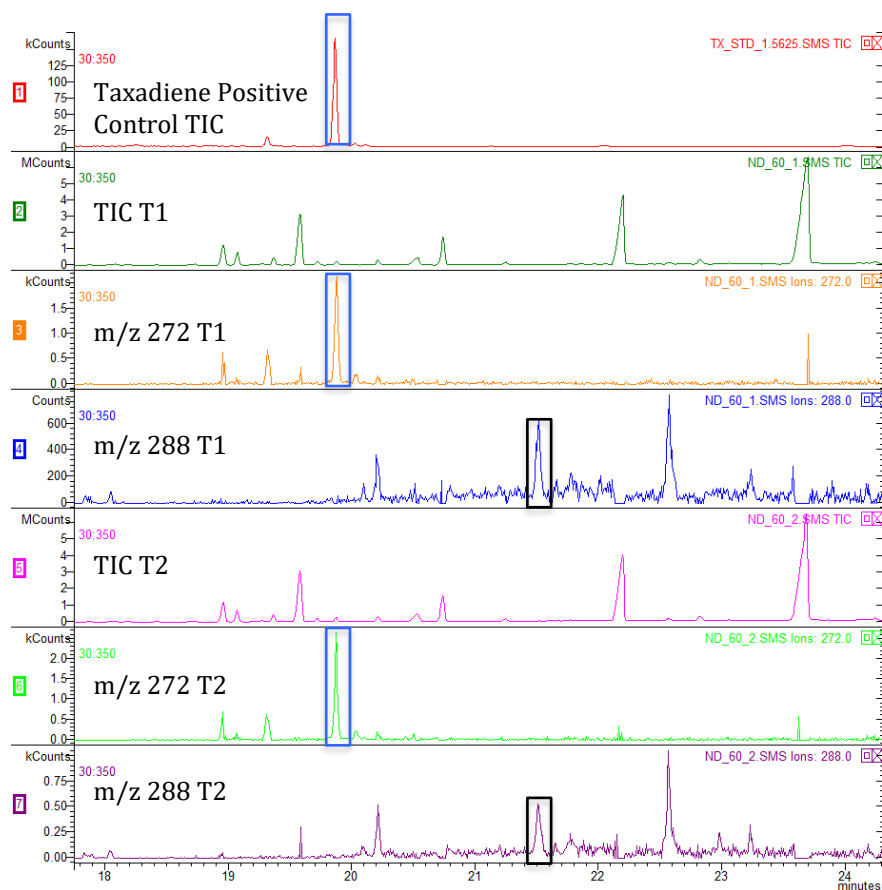

**OCT Values**  
 1 – 1380 AU  
 2 – 1230 AU

**Figure S-13.** GC of 60  $\mu$ M Taxadiene Incubation for Kinetics Evaluation. The m/z filtering information is found in the left side of each panel. The positive control for Taxadiene (blue box) corresponds to the unreacted taxadiene in each substrate trial (blue boxes in m/z 272). OCT (black box at m/z 288, 21.60 minutes) was identified by matching the retention time of this peak to that of our previously identified OCT retention time from our previous work. Peak area was converted to grams by using a taxadiene standard curve.

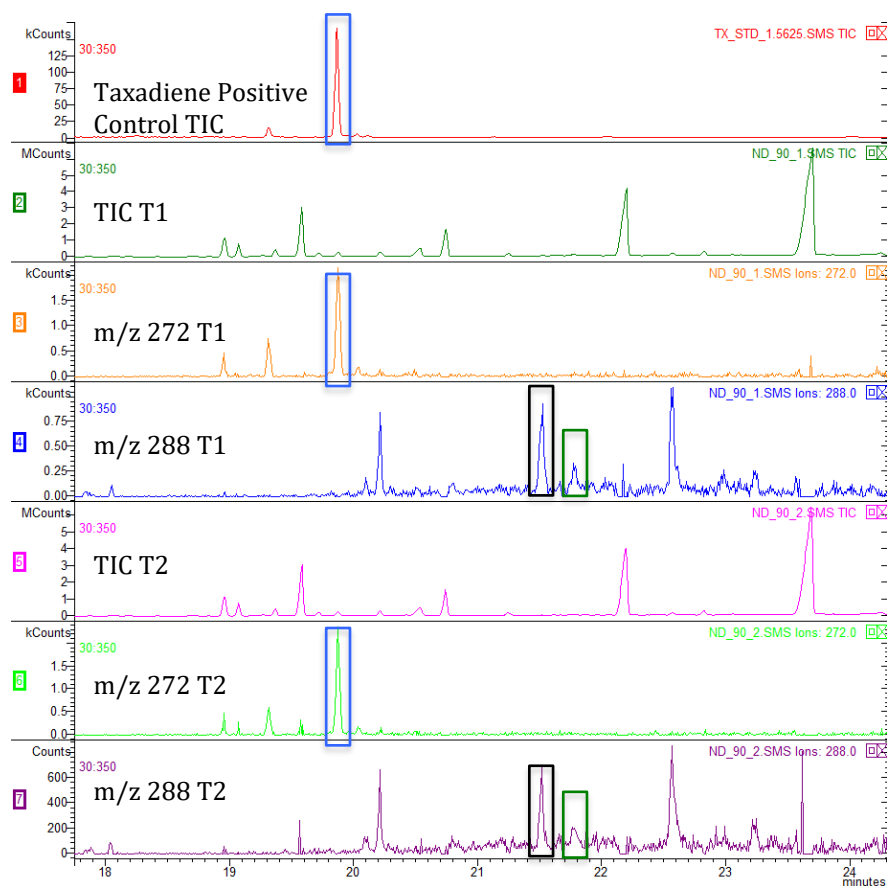

**OCT Values**  
 1 – 2137 AU  
 2 – 1475 AU

**T-5 $\alpha$ -ol Values**  
 1 – 602 AU  
 2 – 442 AU

**Figure S-14.** GC of 90  $\mu$ M Taxadiene Incubation for Kinetics Evaluation. The m/z filtering information is found in the left side of each panel. The positive control for Taxadiene (blue box) corresponds to the unreacted taxadiene in each substrate trial (blue boxes in m/z 272). OCT (black box at m/z 288, 21.60 minutes) was identified by matching the retention time of this peak to that our previously identified OCT retention time from our previous work. At this taxadiene concentration the production of Taxadiene-5 $\alpha$ -ol was also observed (green box at m/z 288 21.85 minutes). Peak area was converted to grams by using a taxadiene standard curve.



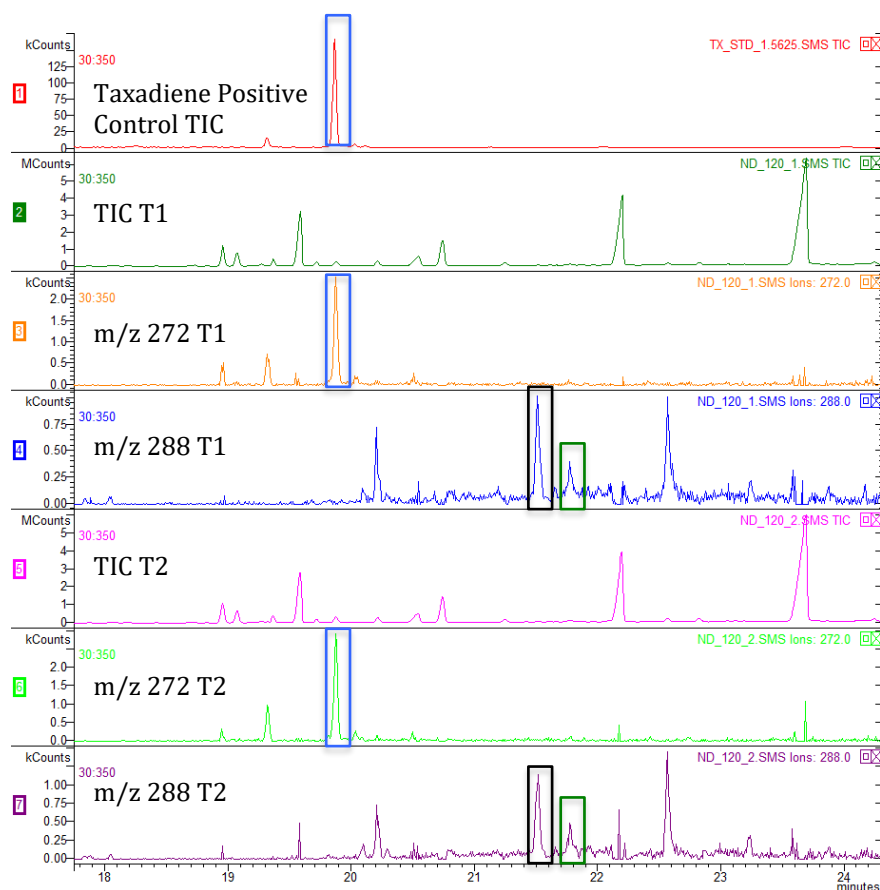

**OCT Values**

1 – 2080 AU

2 – 2472 AU

**T-5 $\alpha$ -ol Values**

1 – 606 AU

2 – 1006 AU

**Figure S-15.** GC of 120  $\mu$ M Taxadiene Incubation for Kinetics Evaluation. The m/z filtering information is found in the left side of each panel. The positive control for Taxadiene (blue box) corresponds to the unreacted taxadiene in each substrate trial (blue boxes in m/z 272). OCT (black box at m/z 288, 21.60 minutes) was identified by matching the retention time of this peak to that our previously identified OCT retention time from our previous work. At this taxadiene concentration the production of Taxadiene-5 $\alpha$ -ol was also observed (green box at m/z 288 21.85 minutes). Peak area was converted to grams by using a taxadiene standard curve.

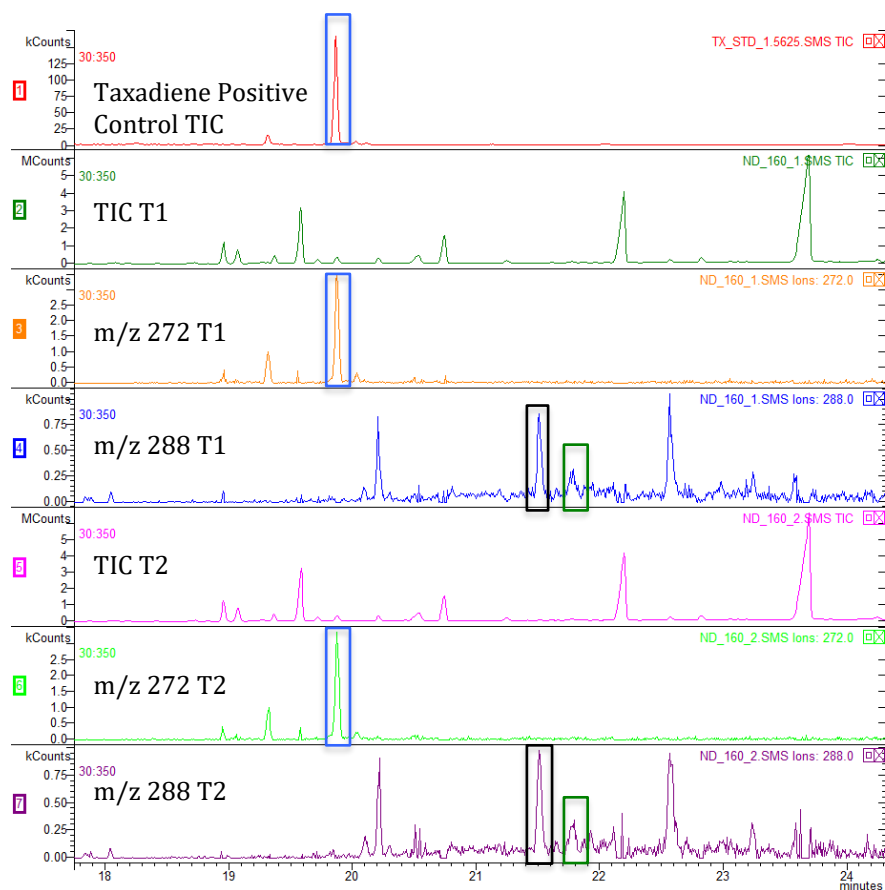

**OCT Values**  
 1 – 2012 AU  
 2 – 2310 AU

**T-5 $\alpha$ -ol Values**  
 1 – 795 AU  
 2 – 865 AU

**Figure S-16.** GC of 160  $\mu$ M Taxadiene Incubation for Kinetics Evaluation. The m/z filtering information is found in the left side of each panel. The positive control for Taxadiene (blue box) corresponds to the unreacted taxadiene in each substrate trial (blue boxes in m/z 272). OCT (black box at m/z 288, 21.60 minutes) was identified by matching the retention time of this peak to that our previously identified OCT retention time from our previous work. At this taxadiene concentration the production of Taxadiene-5 $\alpha$ -ol was also observed (green box at m/z 288 21.85 minutes). Peak area was converted to grams by using a taxadiene standard curve.

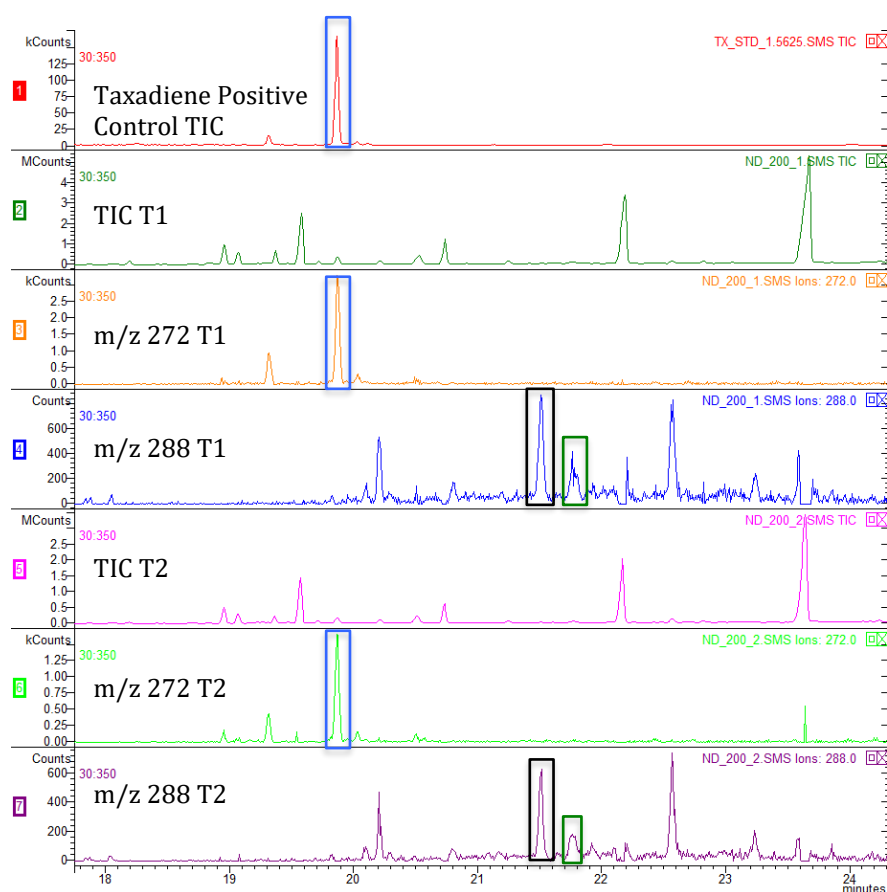

**OCT Values**

1 – 2070 AU

2 – 1456 AU

**Taxadiene-5 $\alpha$ -ol Values**

1 – 1049 AU

2 – 708 AU

**Figure S-17.** GC of 200  $\mu$ M Taxadiene Incubation for Kinetics Evaluation. The m/z filtering information is found in the left side of each panel. The positive control for Taxadiene (blue box) corresponds to the unreacted taxadiene in each substrate trial (blue boxes in m/z 272). OCT (black box at m/z 288, 21.60 minutes) was identified by matching the retention time of this peak to that our previously identified OCT retention time from our previous work. At this taxadiene concentration the production of Taxadiene-5 $\alpha$ -ol was also observed (green box at m/z 288 21.85 minutes). Peak area was converted to grams by using a taxadiene standard curve.

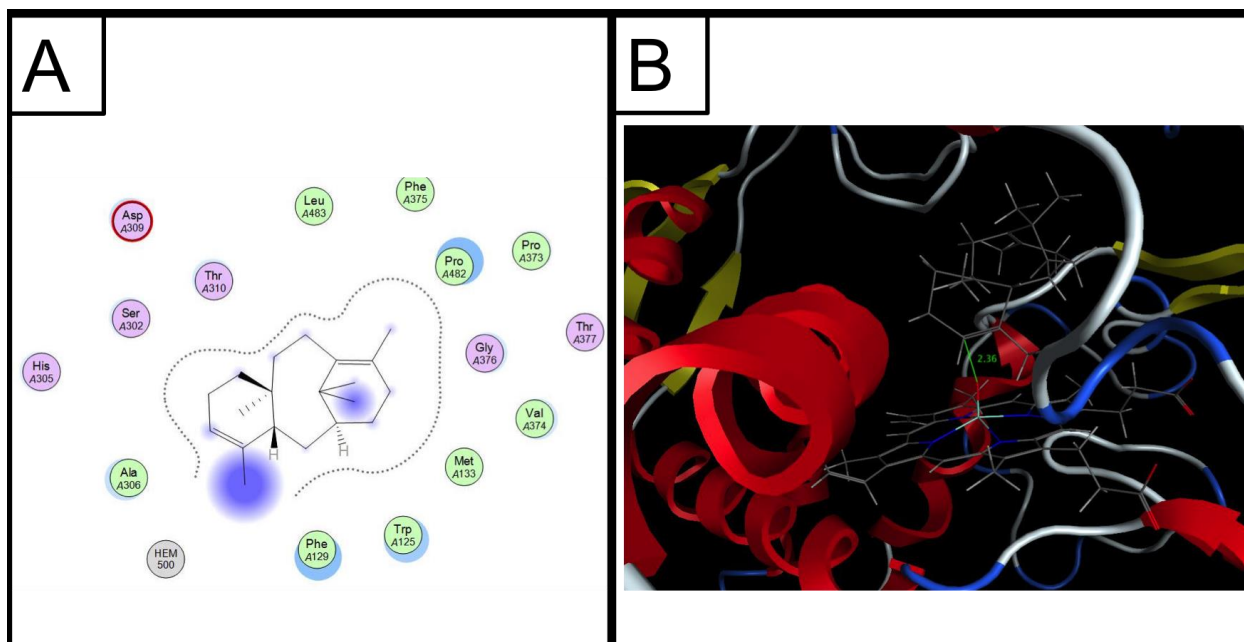

**Figure S-18.** *MOE Residues Used in Docking and Rendering of Active Site.* (A) MOE Output of Residues used when docking Taxadiene. The purple residues are polar and the red circle signifies Asp as Acidic. Green residues are greasy/non polar. The dark blue circles on Taxadiene signify ligand exposure sites and the lighter blue circles on residues signify receptor exposure. (B) MOE rendering of Taxadiene docked into CYP725A4 Active Site. Taxadiene C5 is 2.36 Angstroms away from the heme.
